# Supplementary material
Source: PubMed Central journal article supplement (PMC4524560)

# Suppl. Fig. 2

**A**

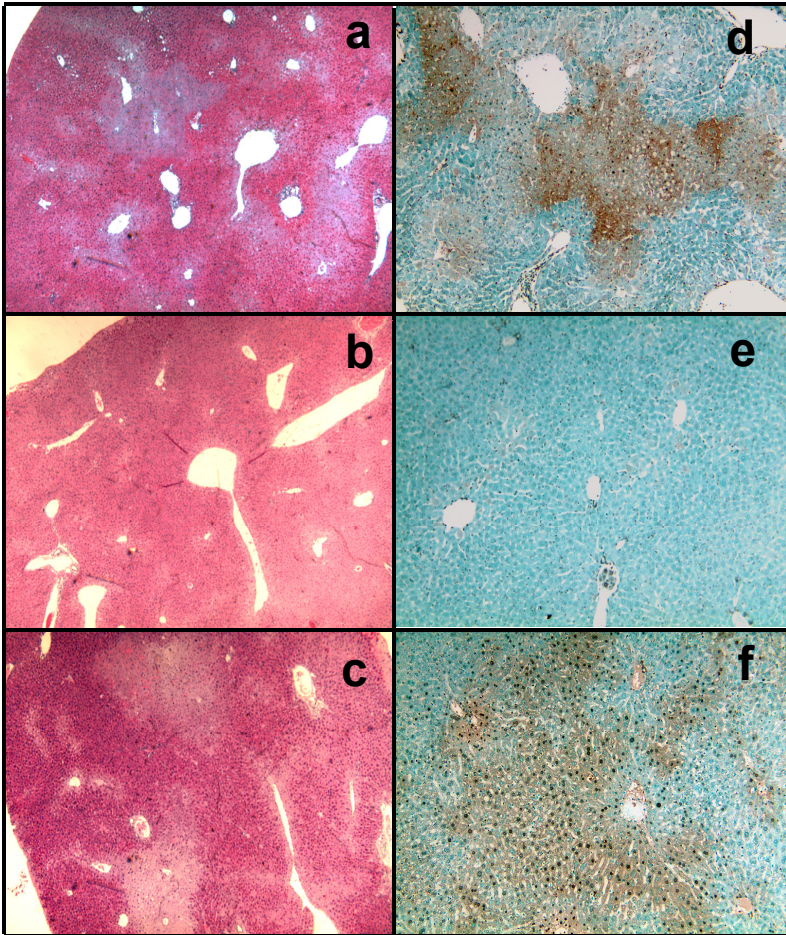

**B**

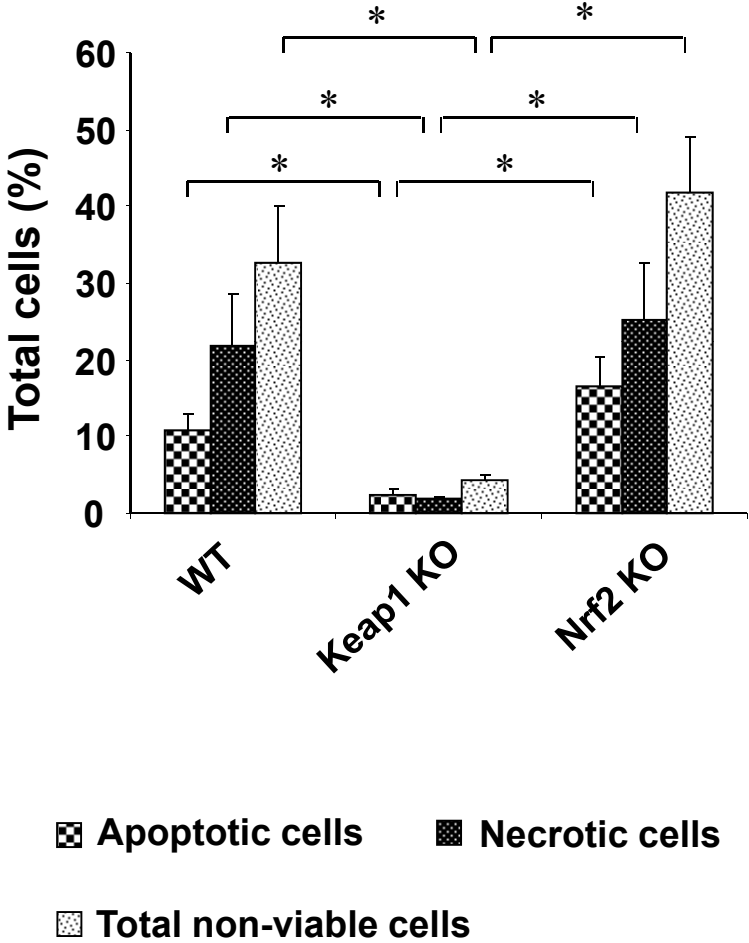

Supplement: NIHMS706740-supplement-2.pdf [file NIHMS706740-supplement-2.pdf]

# Suppl. Fig. 3

**A**

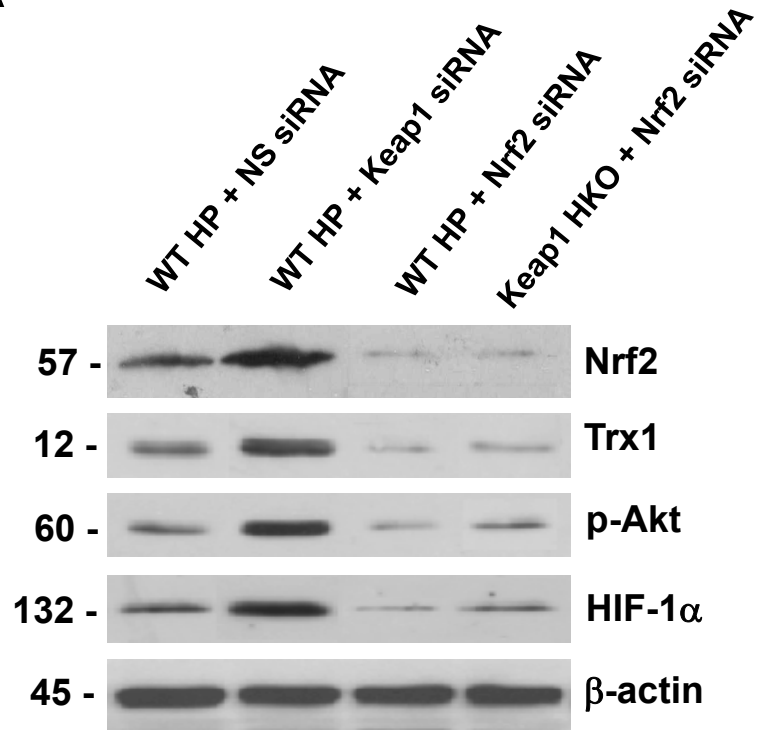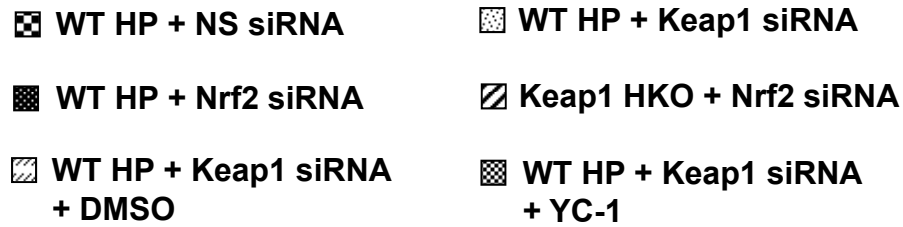

**B**

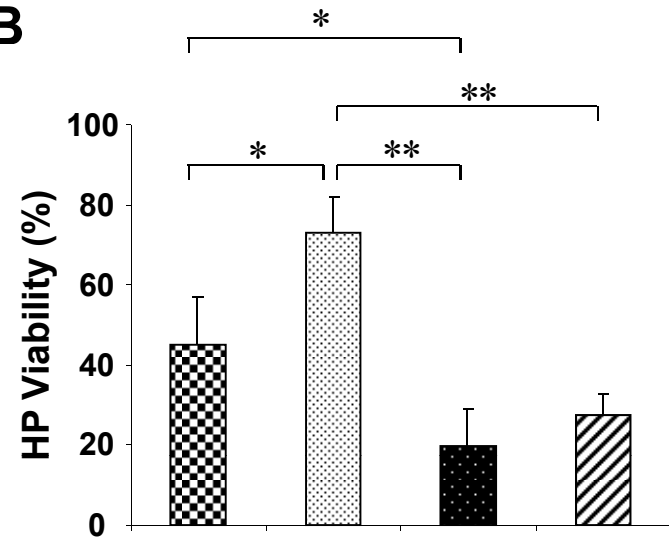

**C**

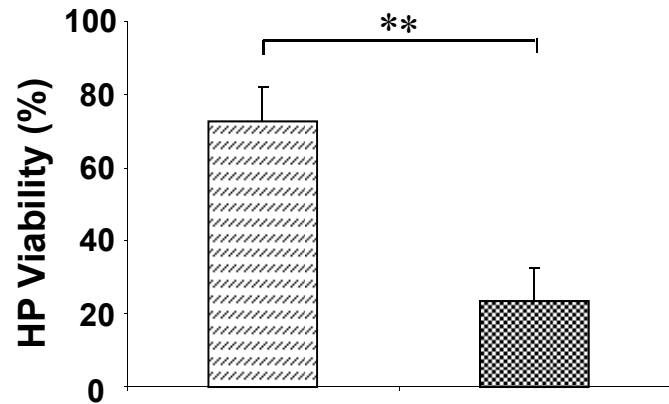

Supplement: NIHMS706740-supplement-3.pdf [file NIHMS706740-supplement-3.pdf]
